# Supplementary material for: Tungsten-promoted titania as solid acid for catalytic hydrolysis of waste bottle PET in supercritical CO2
Source: Royal Society of Chemistry journal article supplement (doi:10.1039/c6ra06298a), 2016-01-01
Supplement: c6ra06298a1.pdf [file c6ra06298a1.pdf]

# Investigation on Tungsten-Promoted Titania as Solid Acid for Catalytic Hydrolysis of Waste Bottle PET in Supercritical CO<sub>2</sub>

Wen-Ze Guo, Hui Lu, Xue-Kun Li, and Gui-Ping Cao\*

UNILAB, State Key Lab of Chemical Engineering, School of Chemical Engineering

East China University of Science and Technology, Shanghai 200237, China

## Supplementary Information

*1. H<sub>2</sub>-TPR characterization of the fresh, used and reactivated 0.30 W-Ti solid catalysts.*

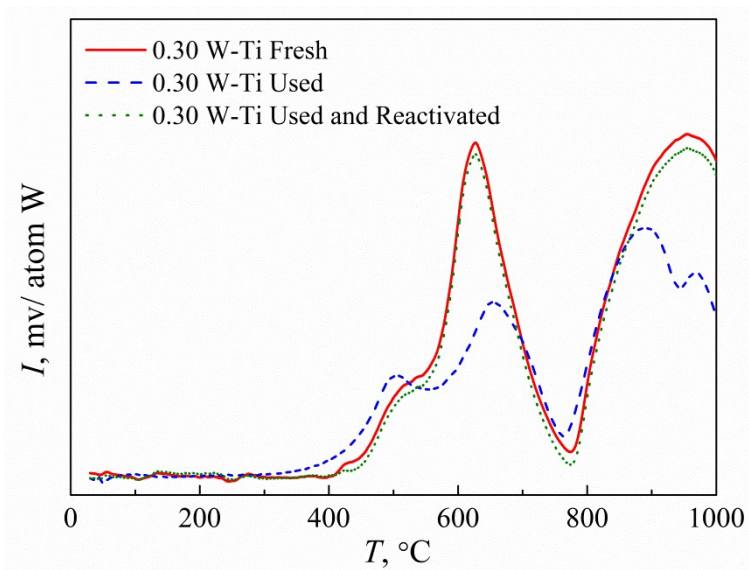

**Figure S1.** The H<sub>2</sub>-TPR profiles of the fresh, used and reactivated 0.30 W-Ti solid catalysts.

**2.  $\text{NH}_3$ -TPD characterization of the fresh, used and reactivated 0.30 W-Ti solid catalysts.**

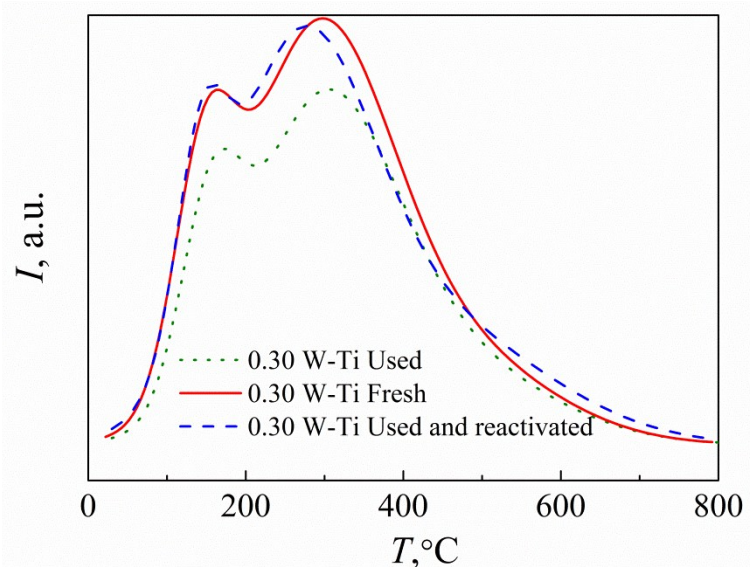

**Figure S2.** The  $\text{NH}_3$ -TPD profiles of the fresh, used and reactivated 0.30 W-Ti solid catalysts.

**3. SEM characterization of partly-hydrolyzed PET treated without catalysts**

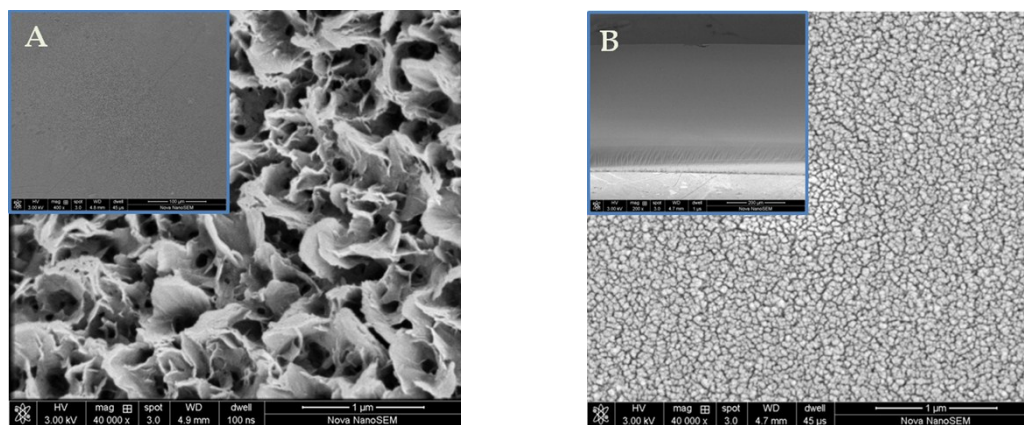

**Figure S3.** The morphology of the partly-hydrolyzed PET ( $D=0.0632$  g/g) treated at 160 °C and 15 MPa for 6 h without catalysts. (A) surface; (B) cross section

**4. XRD characterization of partly-hydrolyzed PET**

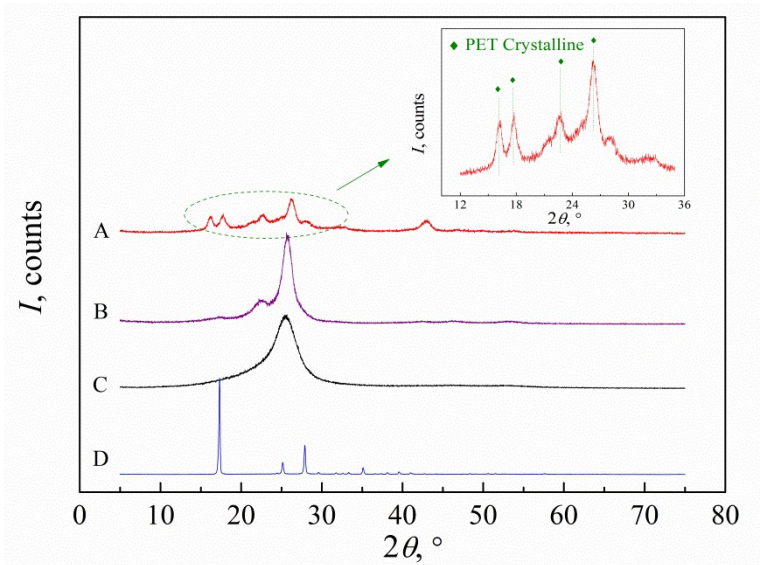

**Figure S4.** The XRD patterns of (A) residual PET hydrolyzed over 0.30 W-Ti catalysts in SC CO<sub>2</sub> at 160 °C and 15 MPa for 9 h, (B) residual PET swelled by SC CO<sub>2</sub> at 160 °C and 15 MPa for 9 h without catalysts, (C) original PET, (D) TPA product.
